# Supplementary material for: Heat-inactivated Bifidobacterium adolescentis ameliorates colon senescence through Paneth-like-cell-mediated stem cell activation
Source: Springer Nature journal article supplement (doi:10.1038/s41467-023-41827-0), 2023-09-30
Supplement: MOESM1 [file 41467_2023_41827_MOESM1_ESM.pdf]

# Supplementary Information

## Heat-inactivated *Bifidobacterium adolescentis* ameliorates colon senescence through Paneth-like-cell-mediated stem cell activation

Yadong Qi<sup>1,2,#</sup>, Jiamin He<sup>1,2,#</sup>, Yawen Zhang<sup>1,2,3,#</sup>, Qiwei Ge<sup>2,4,#</sup>, Qiwen Wang<sup>1,2,#</sup>, Luyi Chen<sup>3,5</sup>,  
Jilei Xu<sup>1,2</sup>, Lan Wang<sup>1,2</sup>, Xueqin Chen<sup>1,2</sup>, Dingjiacheng Jia<sup>2,4</sup>, Yifeng Lin<sup>2,4</sup>, Chaochao Xu<sup>2,4</sup>,  
Ying Zhang<sup>2,4</sup>, Tongyao Hou<sup>1,2</sup>, Jianmin Si<sup>1,2,3,\*</sup>, Shujie Chen<sup>1,2,3,\*</sup>, Liangjing Wang<sup>2,3,4,\*</sup>

<sup>1</sup> Department of Gastroenterology, Sir Run Run Shaw Hospital, Zhejiang University School of Medicine, Hangzhou, Zhejiang, China.

<sup>2</sup> Institute of Gastroenterology, Zhejiang University, Hangzhou, Zhejiang, China

<sup>3</sup> Prevention and Treatment Research Center for Senescent Disease, Zhejiang University School of Medicine, Hangzhou, Zhejiang, China

<sup>4</sup> Department of Gastroenterology, Second Affiliated Hospital of Zhejiang University School of Medicine, Hangzhou, Zhejiang, China

<sup>5</sup> Department of General Practice, Sir Run Run Shaw Hospital, Zhejiang University School of Medicine, Hangzhou, Zhejiang, China

# These authors contributed equally: Yadong Qi, Jiamin He, Yawen Zhang, Qiwei Ge, and Qiwen Wang.

### \* Corresponding Authors:

**Liangjing Wang**, Second Affiliated Hospital of Zhejiang University School of Medicine, 88 Jiefang Rd, Hangzhou 310009, Zhejiang, PR China, Tel +86 0571 89713905, E-mail: [wangljzju@zju.edu.cn](mailto:wangljzju@zju.edu.cn); **Shujie Chen**, Sir Run Run Shaw Hospital, Zhejiang University School of Medicine, 3 East Qingchun Rd, Hangzhou 310020, Zhejiang, PR China, Tel +86 0571 86006788, E-mail: [chenshujie77@zju.edu.cn](mailto:chenshujie77@zju.edu.cn); **Jianmin Si**, Sir Run Run Shaw Hospital, Zhejiang University School of Medicine, 3 East Qingchun Rd, Hangzhou 310020, Zhejiang, PR China, Tel +86 0571 86006788, E-mail: [sijm@zju.edu.cn](mailto:sijm@zju.edu.cn)

**a**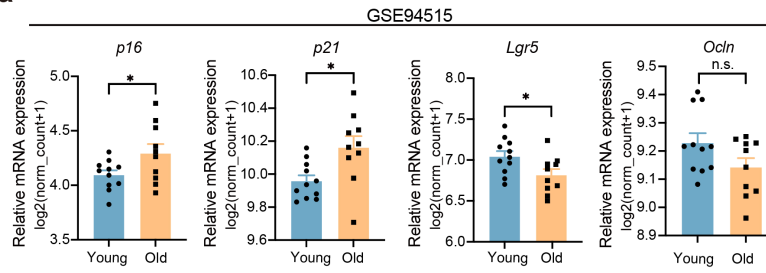**b**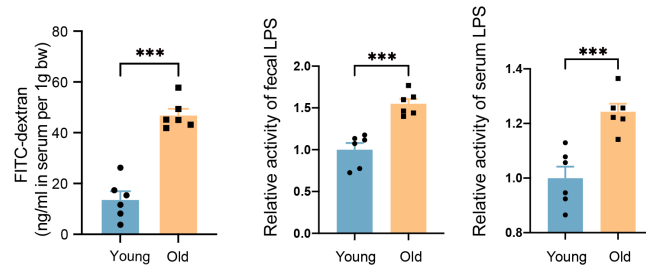**c**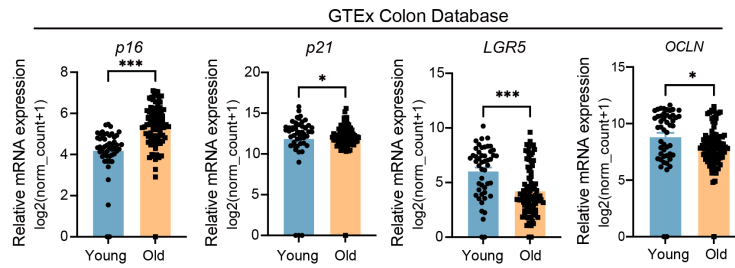**d**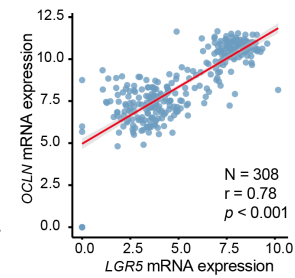**e**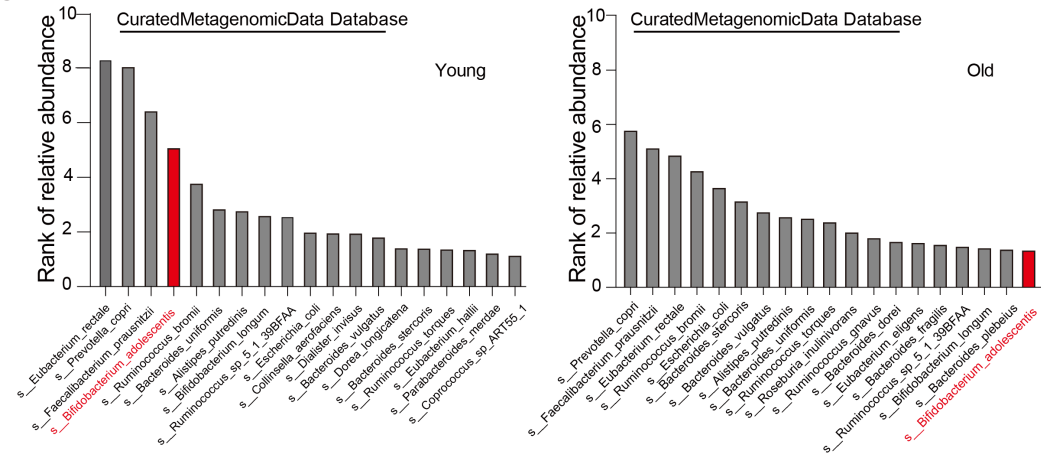**f**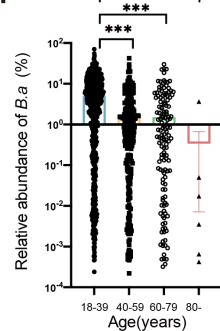**g**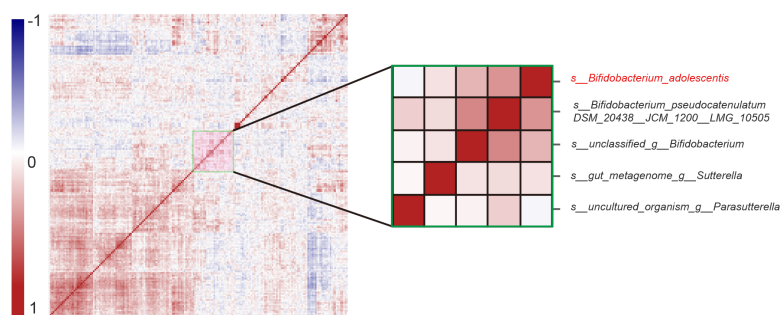

**Supplementary Fig. 1 The association between the senescent colon and age-related *B. adolescentis*.**

(a). Relative expression of *p21*, *p16*, *Lgr5* and *Ocln* gene in colon tissues of young (3 months, n=11) and old (19 months, n =10 ) mice (GSE94515 dataset). Data were represented as mean  $\pm$  SEM. Comparisons were performed by unpaired, two-tailed *t*-test (b). FITC-dextran concentration in the serum in young (3-month-old) and old (12-month-old) mice group. Relative LPS levels in the fecal and serum samples in young and old mice group, n = 6 animals *per* group. Data were represented as mean  $\pm$  SEM. Comparisons were performed by unpaired, two-tailed *t*-test. (c). Relative mRNA levels of *p21*, *p16*, *LGR5* and *OCN* genes in normal colon tissues of young (20-39 years, n = 49 individuals ) and old (60-79 years, n = 90 individuals) groups from the GTEx database. Data were the mean  $\pm$  SEM. Comparisons were performed by unpaired, two-tailed *t*-test (d). The correlation analysis of the expression of *OCN* and *LGR5* in human colonic tissues from the GTEx database, n = 308 individuals, Spearman  $r = 0.78$ . Comparisons were performed by Spearman's correlation analysis. (e). Rank of relative abundance for major bacteria species in young or old populations shared at the CuratedMetagenomicData Database. The ranking order of *B. adolescentis* was marked with red. (f). Relative abundance of *B. adolescentis* in age subgroups in CuratedMetagenomicData. Relative abundance was represented in plots as mean  $\pm$  SEM. Comparisons were performed by Kruskal-Wallis test followed by Dunn's multiple comparisons test (g). Co-expression relationship network of distinct differences in the microbiome composition in clinical age cohort. \* $p < 0.05$ , \*\* $p < 0.01$ , \*\*\* $p < 0.001$ , n.s. not significant. Source data and exact *p*-value are provided as a Source Data file.

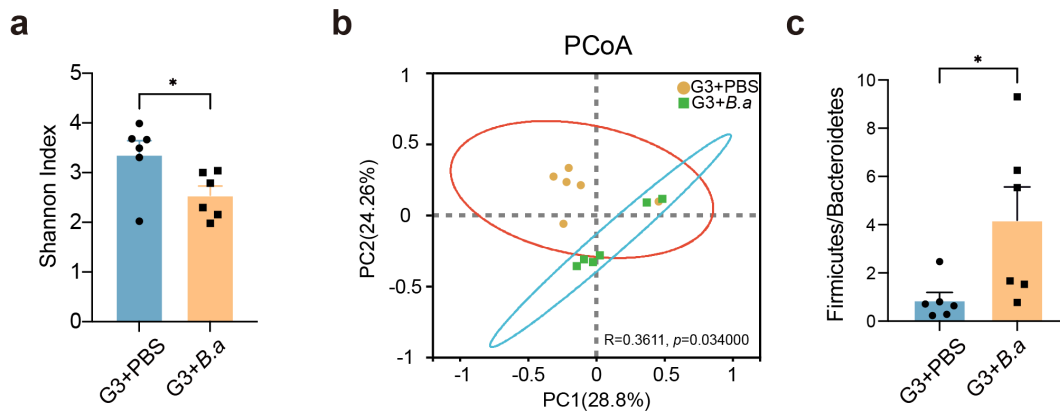

**Supplementary Fig. 2. *B. adolescentis* supplementation reshaped the microbial community.**

(a-b). The  $\alpha$ -diversity and the  $\beta$ -diversity of fecal microbiomes. Data were represented as mean  $\pm$  SEM. n = 6 animals *per* group. Comparisons were performed by unpaired, two-tailed *t*-test. (c). Proportions of the Firmicutes and the Bacteroidetes (F/B). n = 6 animals *per* group. Data were represented as mean  $\pm$  SEM. Comparisons were performed by unpaired, two-tailed *t*-test. \**p* < 0.05. Source data and exact *p*-value are provided as a Source Data file.

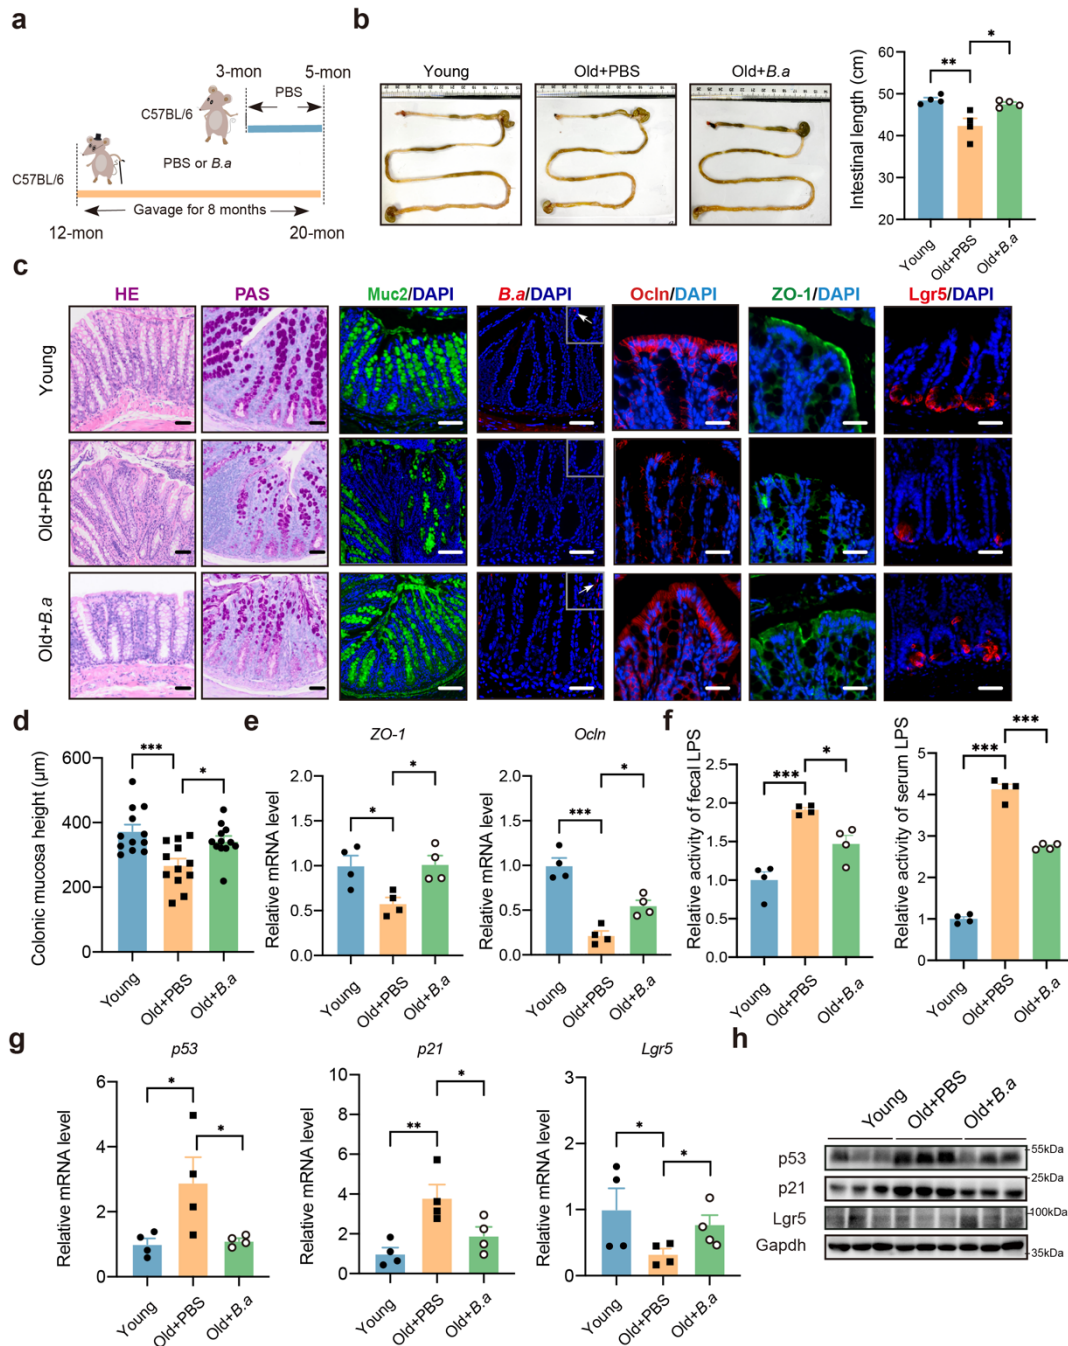

**Supplementary Fig. 3. Heated-inactivated *B. adolescentis* alleviated colon senescence phenotype in natural aging mice.**

(a). The schematic diagram of the experimental procedure in the young (3-month-old) and old (20-month-old) C57BL/6 mice. (b). Representative image of gross morphology and length analysis of the mouse colon. Data were mean  $\pm$  SEM. n = 4 animals per group. Comparisons were performed by One-way ANOVA analysis followed by Tukey's multiple comparisons test. (c). Representative image of H&E staining and PAS staining, immunofluorescence image of Muc2, ZO-1 and Ocln and

Lgr5, FISH probe of *B. adolescentis* in the colon from Young, Old+PBS and Old+*B.a* mice. Scale bar, 50  $\mu$ m. n = 6 animals *per* group. (d). The mucosal height was measured. n = 12 random fields *per* group. Data were represented as mean  $\pm$  SEM. Comparisons were performed by One-way ANOVA analysis followed by Tukey's multiple comparisons test (e). Relative mRNA levels of *ZO-1* and *Ocln* genes in Young, Old+PBS and Old+*B.a* mice. n = 4 animals *per* group. Data were represented as mean  $\pm$  SEM. Comparisons were performed by One-way ANOVA analysis followed by Tukey's multiple comparisons test. (f). Relative LPS levels in the fecal and serum samples in Young, Old+PBS and Old+*B.a* mice. n = 4 animals *per* group. Data were represented as mean  $\pm$  SEM. Comparisons were performed by One-way ANOVA analysis followed by Tukey's multiple comparisons test. (g). Relative mRNA levels of *p53*, *p21* and *Lgr5* gene in Young, Old+PBS and Old+*B.a* mice. n = 4 animals *per* group. Data were represented as mean  $\pm$  SEM. Comparisons in *p53*, *p21* were performed by One-way ANOVA analysis followed by Two-stage linear step-up procedure of Benjamini, Krieger and Yekutieli and in *Lgr5* were performed by Kruskal-Wallis test followed by Two-stage linear step-up procedure of Benjamini, Krieger and Yekutieli. (h). The protein level of p53, p21 and Lgr5 were detected by immunoblot from Young, Old+PBS and Old+*B.a* mice. n = 3 animals *per* group. \* $p < 0.05$ , \*\* $p < 0.01$ , \*\*\* $p < 0.001$ . Source data and exact  $p$ -value are provided as a Source Data file.

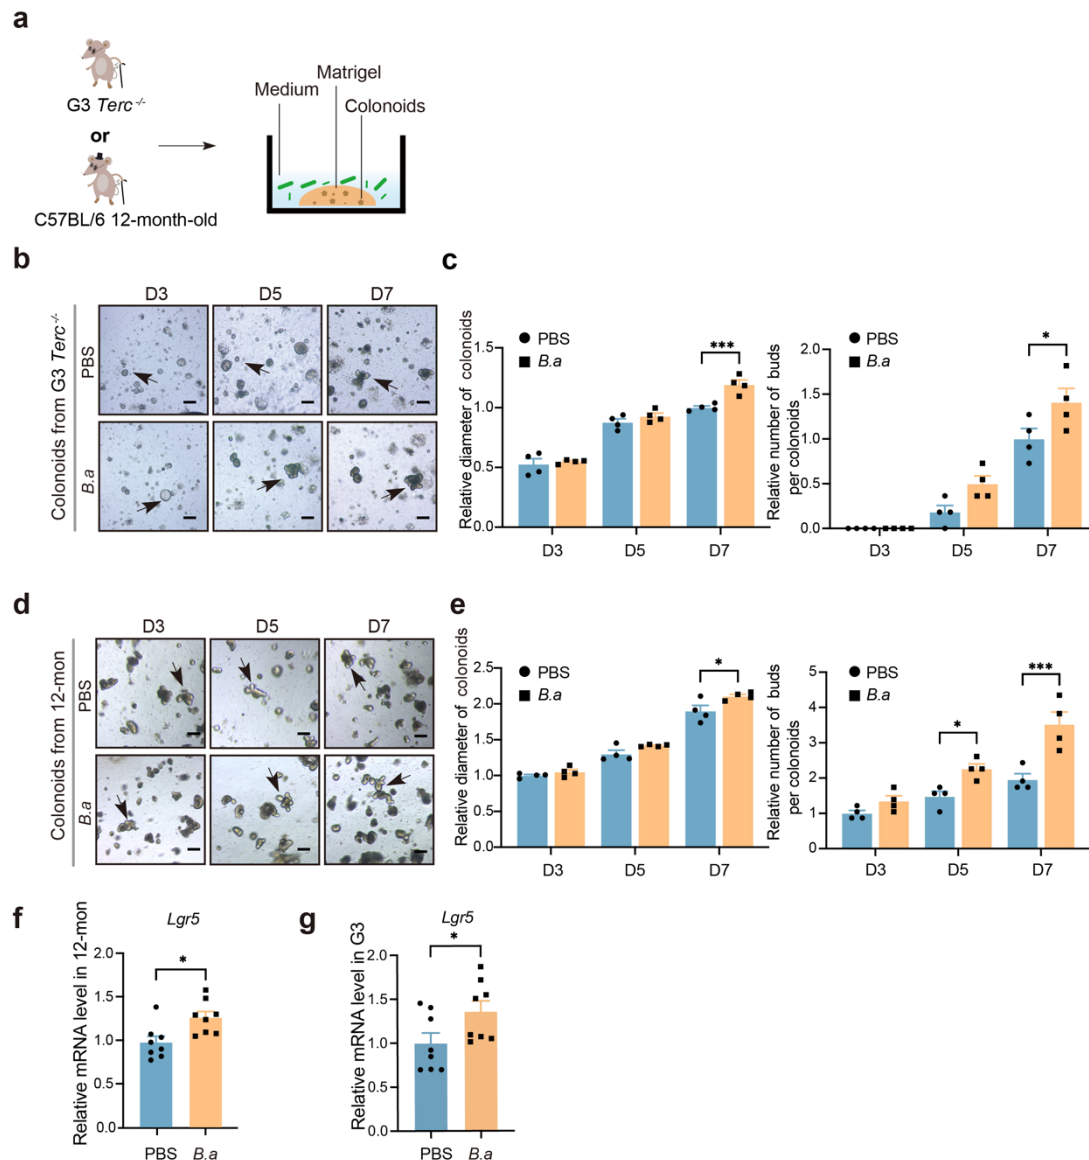

**Supplementary Fig. 4. Heated-inactivated *B. adolescentis* supplementation improved the proliferation of derived colonoids from G3 *Terc*<sup>-/-</sup> mice and natural aging mice.**

(a). The schematic diagram of the experimental procedure in G3 *Terc*<sup>-/-</sup> mice and natural aging mice *in vitro* model. (b). Representative images in organoid-forming capacity on day 3, 5 and 7 from PBS and *B.a* group derived from G3 *Terc*<sup>-/-</sup> mice crypts. Arrows indicate crypt domains. n = 4 biological replicates *per* group. Scale bar, 100  $\mu$ m. (c). Relative size of colonoids quantified on day 3, 5 and 7 and represented relative to PBS treated control. n = 4 biological replicates *per* group. Data were represented as mean  $\pm$  SEM. Comparisons were performed by Two-way ANOVA analysis followed by Bonferroni's multiple comparisons test. (d). Representative images of organoid-forming capacity on day 3, 5 and 7 from PBS and *B.a* treated group derived from 12-month mice crypts. Arrows indicate crypt domains. n = 4 biological replicates *per* group. Scale bar, 100  $\mu$ m. (e). Relative size

of colonoids quantified on day 3, 5 and 7.  $n = 4$  biological replicates *per* group. Data were represented as mean  $\pm$  SEM. Comparisons were performed by Two-way ANOVA analysis followed by Bonferroni's multiple comparisons test. **(f-g)**. Relative mRNA levels of Lgr5 gene in colonoids derived from 12-month or G3 *Terc*<sup>-/-</sup> mice.  $n = 8$  biological replicates *per* group. Data were presented as the mean  $\pm$  SEM. Comparisons were performed by unpaired, two-tailed *t*-test \* $p < 0.05$ , \*\*\* $p < 0.001$ . Source data and exact *p*-value are provided as a Source Data file.

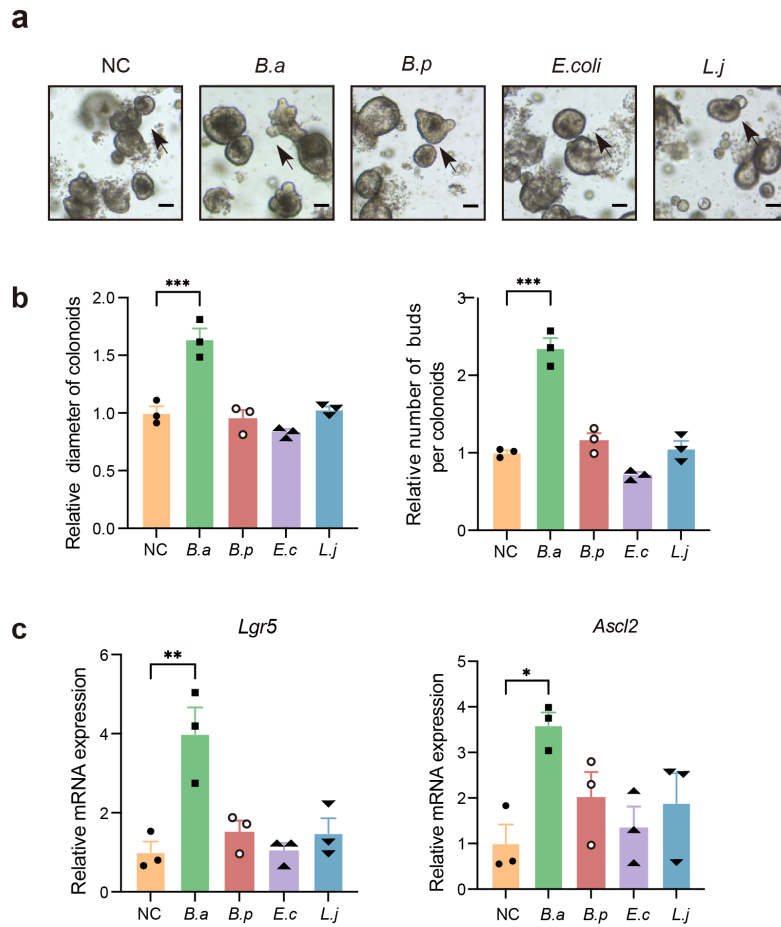

**Supplementary Fig. 5. *B. adolescentis* specifically improved the proliferation of derived colonoids.**

(a-b). Representative images in organoid-forming capacity and size of colonoids quantified from NC, *B.a*, *B.p*, *E.coli* and *L.j* group on day 7. Scale bar, 100  $\mu$ m. Arrows indicate crypt domains.  $n = 3$  independent experiments. Data were represented as mean  $\pm$  SEM and represented relative to NC control. Comparisons were performed by One-way ANOVA analysis followed by followed by Tukey's test. (c). The expression of *Lgr5* and *Ascl2* genes were detected by qPCR from NC, *B.a*, *B.p*, *E.coli* and *L.j* group.  $n = 3$  independent experiments. Data were represented as mean  $\pm$  SEM. Comparisons were performed by One-way ANOVA analysis followed by followed by Tukey's test. \* $p < 0.05$ , \*\* $p < 0.01$ , \*\*\* $p < 0.001$ . *L.j*, *Lactobacillus johnsonii*. *B.p*, *Bifidobacterium pseudolongum*. *E. coli*, *Escherichia coli*. *B.a*, *Bifidobacterium adolescentis*. Source data and exact  $p$ -value are provided as a Source Data file.

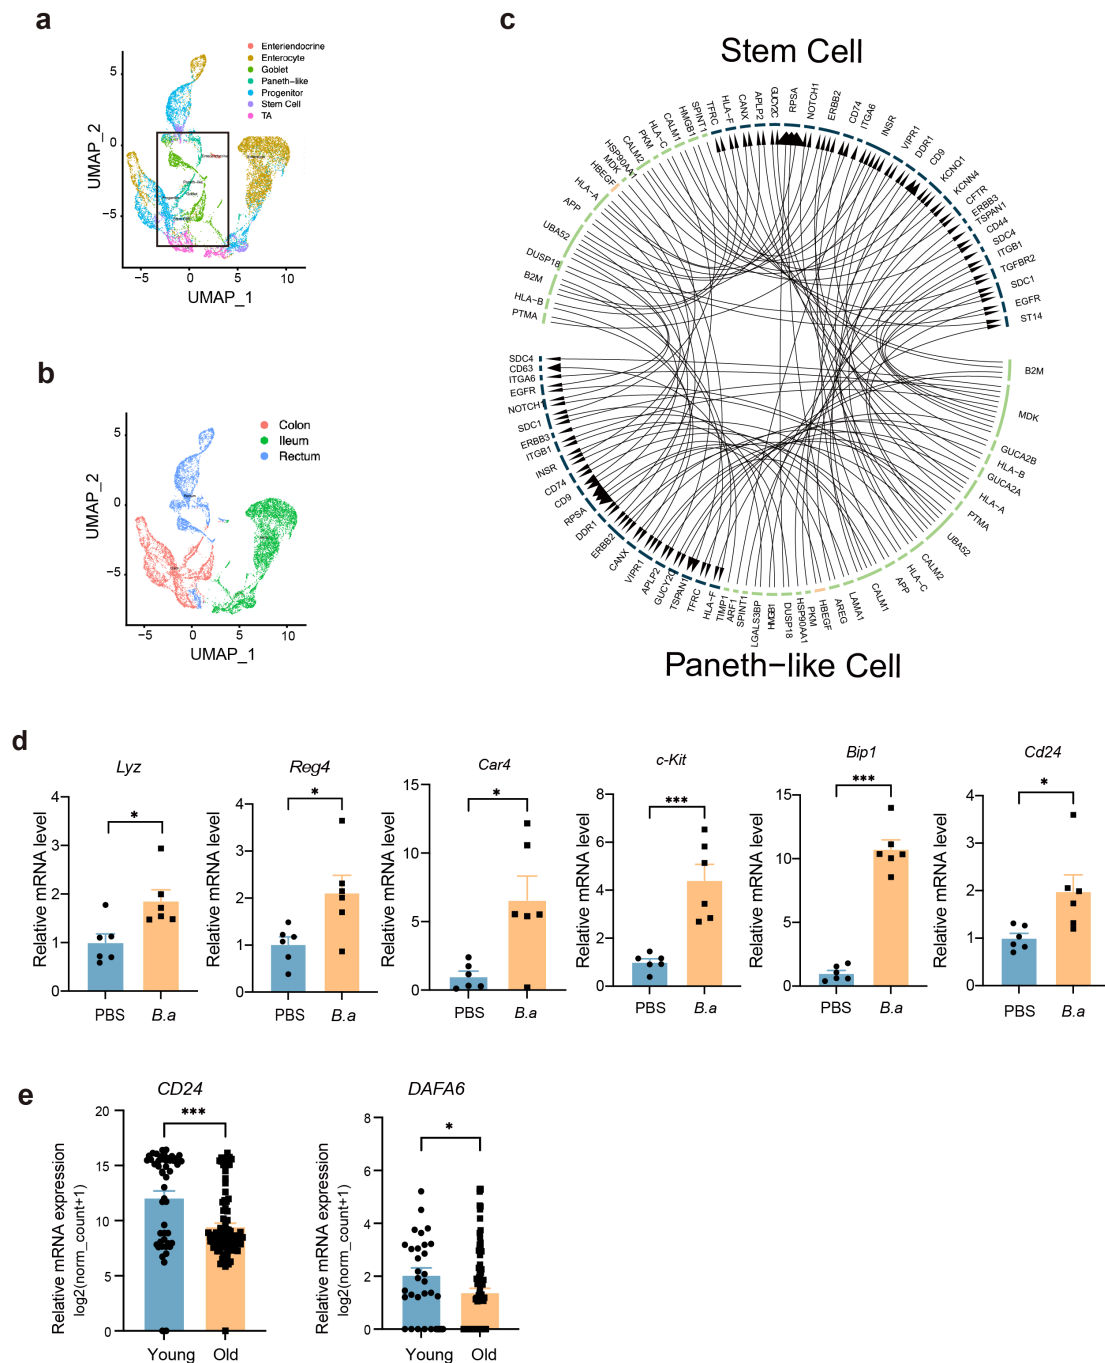

**Supplementary Fig. 6. *B. adolescentis* increased Paneth-like cells development**

(a). Different cell clusters in human gut single-cell transcriptome data (GSE125970). (b). Different tissue types in human gut single-cell transcriptome data (GSE125970). (c). Detail genes involved in cell communication between PLCs and ISCs in the single-cell transcriptome. (d). Relative mRNA levels of *Lyz*, *Reg4*, *Car4*, *c-Kit*, *Bip1* and *Cd24* genes in colonoid model. n = 6 biological replicates per group. Data were presented as the mean  $\pm$  SEM. Comparisons were performed by unpaired, two-tailed *t*-test. (e). Relative expression of *CD24* and *DAFA6* in normal colon tissue of GTEx database. Data were represented as mean  $\pm$  SEM. Comparisons were performed by unpaired, two-

tailed  $t$ -test in *CD24* and Mann-Whitney test in *DAFA6*.  $*p < 0.05$ ,  $***p < 0.001$ . Source data and exact  $p$ -value are provided as a Source Data file.

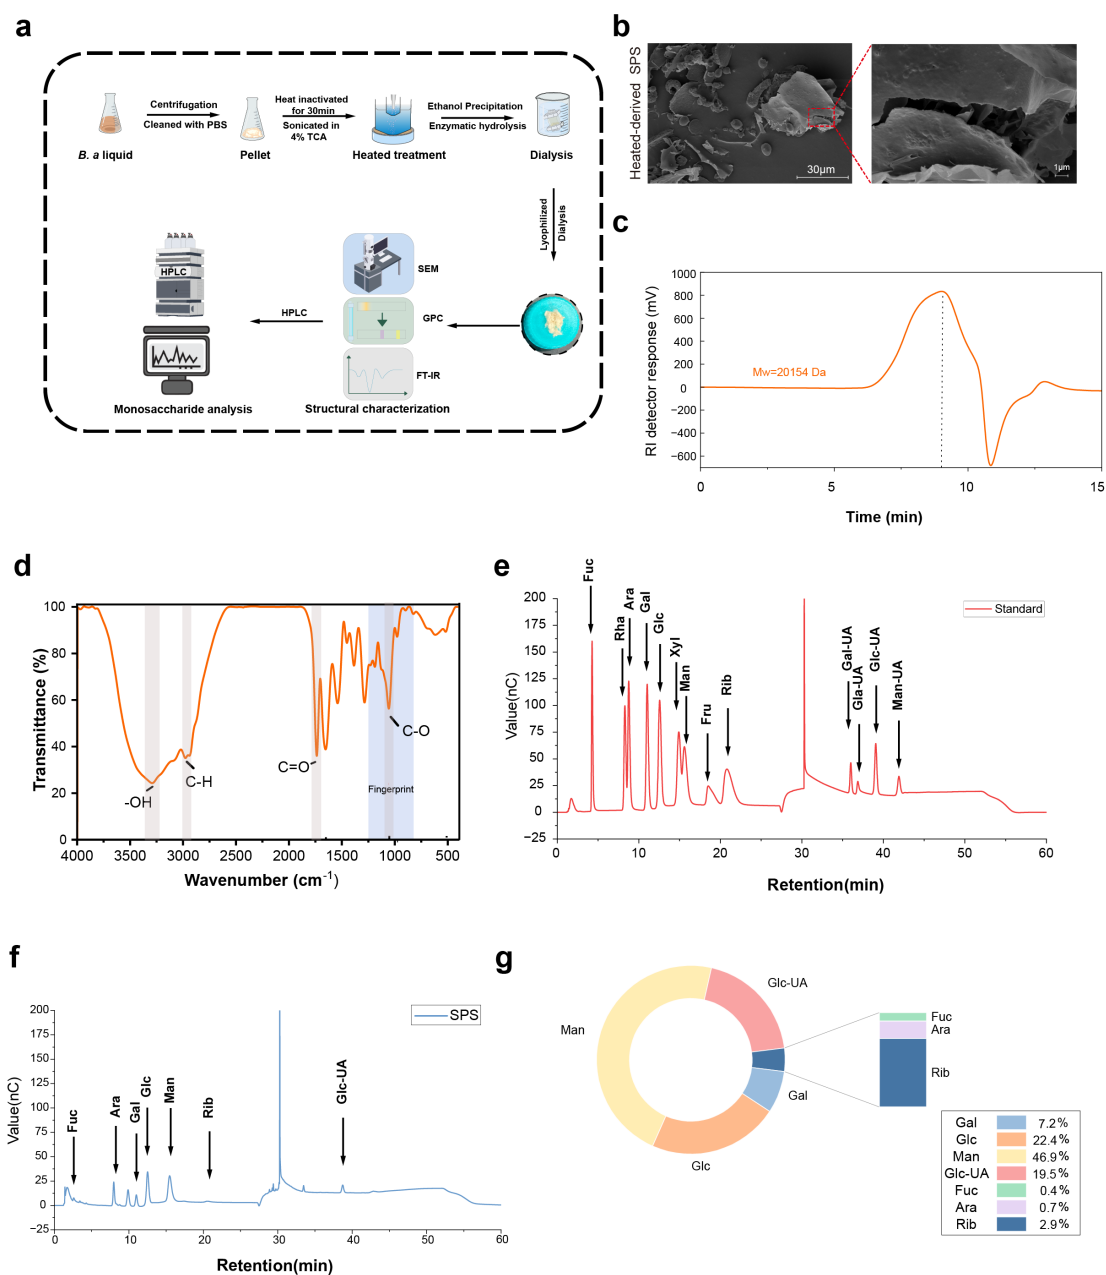

**Supplementary Fig. 7. Structural characterization and monosaccharide composition analysis of SPS**

(a). SPS extraction diagrams from heated-inactivated *B. adolescentis* (95 °C). (b). Scanning electron microscopy (SEM) images (at 500× and 5000× magnification) of heated-derived SPS. (c). Gel permeation chromatography (GPC) profiles of heated-derived SPS, the average molecular weight (Mw) was calculated. (d). Fourier-transform infrared spectroscopy (FT-IR) of heated-derived SPS, labeling the characteristic functional groups of the polysaccharide based on chemical bonds (3307 cm<sup>-1</sup>, 2940 cm<sup>-1</sup>, 1741 cm<sup>-1</sup> and 1056 cm<sup>-1</sup> represents O-H stretching, C-H stretching C=O) stretching and C-OH stretching vibrations, respectively), the gray shaded region corresponds to the fingerprint

spectrum of the polysaccharide. **(e)**. Chromatogram profiles of the monosaccharide. Fuc, Fucose; Rha, Rhamnose; Ara, Arabinose; Gal, Galactose; Glc, Glucose; Xyl, Xylose; Man, Mannose; Fru, Fructose; Rib, Ribose; Gal-UA, Galacturonic Acid; Glc-UA, Glucuronic Acid; Man-UA, Mannuronic Acid; Gul-UA, Guluronic Acid. **(f)**. Chromatogram profiles of the heated-derived SPS, labeling the monosaccharide based on profiles of the standard monosaccharide. **(g)**. The monosaccharide composition of the heated-derived SPS, the number expressed as the mass percentage of SPS. SPS, Soluble polysaccharides. Source data and exact *p*-value are provided as a Source Data file.

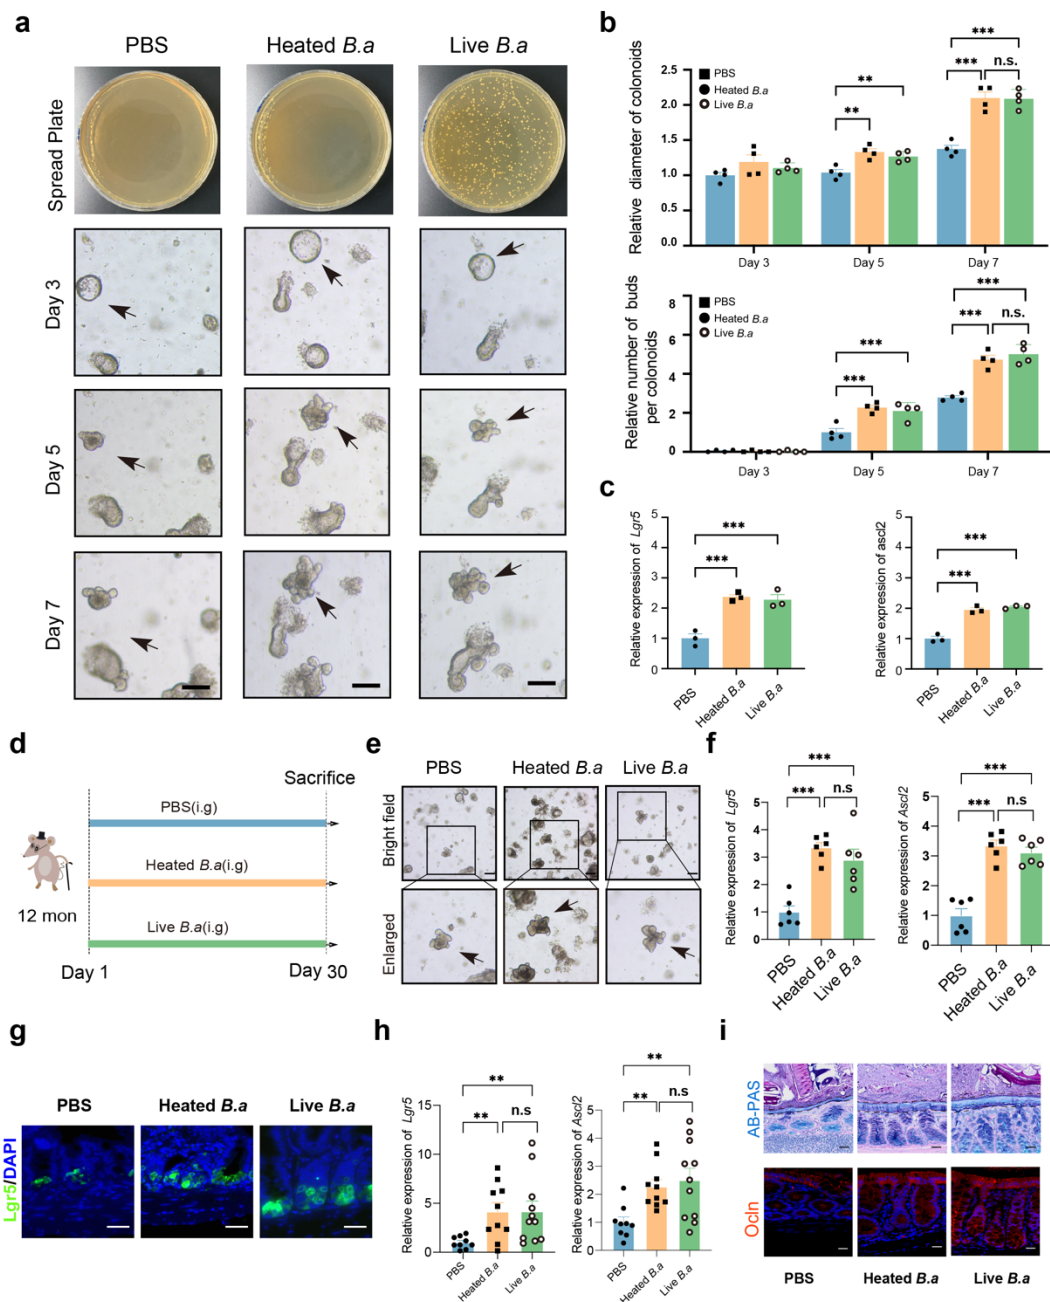

**Supplementary Fig. 8. Live *B. adolescentis* demonstrated a comparable effect as heat-inactivated *B. adolescentis* in vitro colonoids**

(a). Representative images are shown in the Dilution plating (above) and organoid-forming capacity of crypts (below) from PBS, heat-inactivated *B. adolescentis* and live *B. adolescentis* treated group. Arrows indicate crypt domains. Scale bar, 100  $\mu$ m. n = 4 independent experiments. (b). The relative size of colonoids was quantified on days 3, 5 and 7 and represented relative to the PBS-treated group. n = 4 independent experiments. Data were represented as mean  $\pm$  SEM. Comparisons were performed by Two-way ANOVA analysis followed by Tukey's test. (c). Relative expression of *Lgr5*

and Ascl2 gene in PBS, heat-inactivated *B. adolescentis* and live *B. adolescentis* treated group. n =3 independent experiments. Data were represented as mean  $\pm$  SEM. Comparisons were performed by One-way ANOVA analysis followed by Tukey's test. **(d)**. The schematic diagram of the 12-month mice experimental procedure in PBS group (n=9), heat-inactivated *B. adolescentis* group (n=10) and live *B. adolescentis* group (n=11). **(e)**. Representative images in the organoid-forming capacity of crypts (Right) from PBS group, heat-inactivated *B. adolescentis* group and live *B. adolescentis* group. Arrows indicate crypt domains. Scale bar, 100  $\mu$ m. n = 6 mice *per* group. **(f)**. Relative expression of Lgr5 and Ascl2 gene in colonoids derived from PBS, heat-inactivated *B. adolescentis* and live *B. adolescentis* treated group. n = 6 mice *per* group. Comparisons were performed by One-way ANOVA analysis followed by Tukey's test. **(g)**. Representative image of *Lgr5* genes was detected in colon tissue from PBS group (n=9), heat-inactivated *B. adolescentis* group (n=10) and live *B. adolescentis* group (n=11). **(h)**. Relative expression of Lgr5 and Ascl2 gene in colon tissue from PBS (n=9), heat-inactivated *B. adolescentis* (n=10) and live *B. adolescentis* treated group (n=11). Data were represented as mean  $\pm$  SEM. Comparisons were performed by One-way ANOVA analysis followed by Tukey's test. **(i)**. Representative image of AB-PAS staining and immunofluorescence image of Ocln in the colon from PBS group (n=9), heat-inactivated *B. adolescentis* group (n=10) and live *B. adolescentis* group (n=11). Scale bar, 50  $\mu$ m. \*\* $p$  < 0.01, \*\*\* $p$  < 0.001, n.s. not significant. Source data and exact  $p$ -value are provided as a Source Data file.

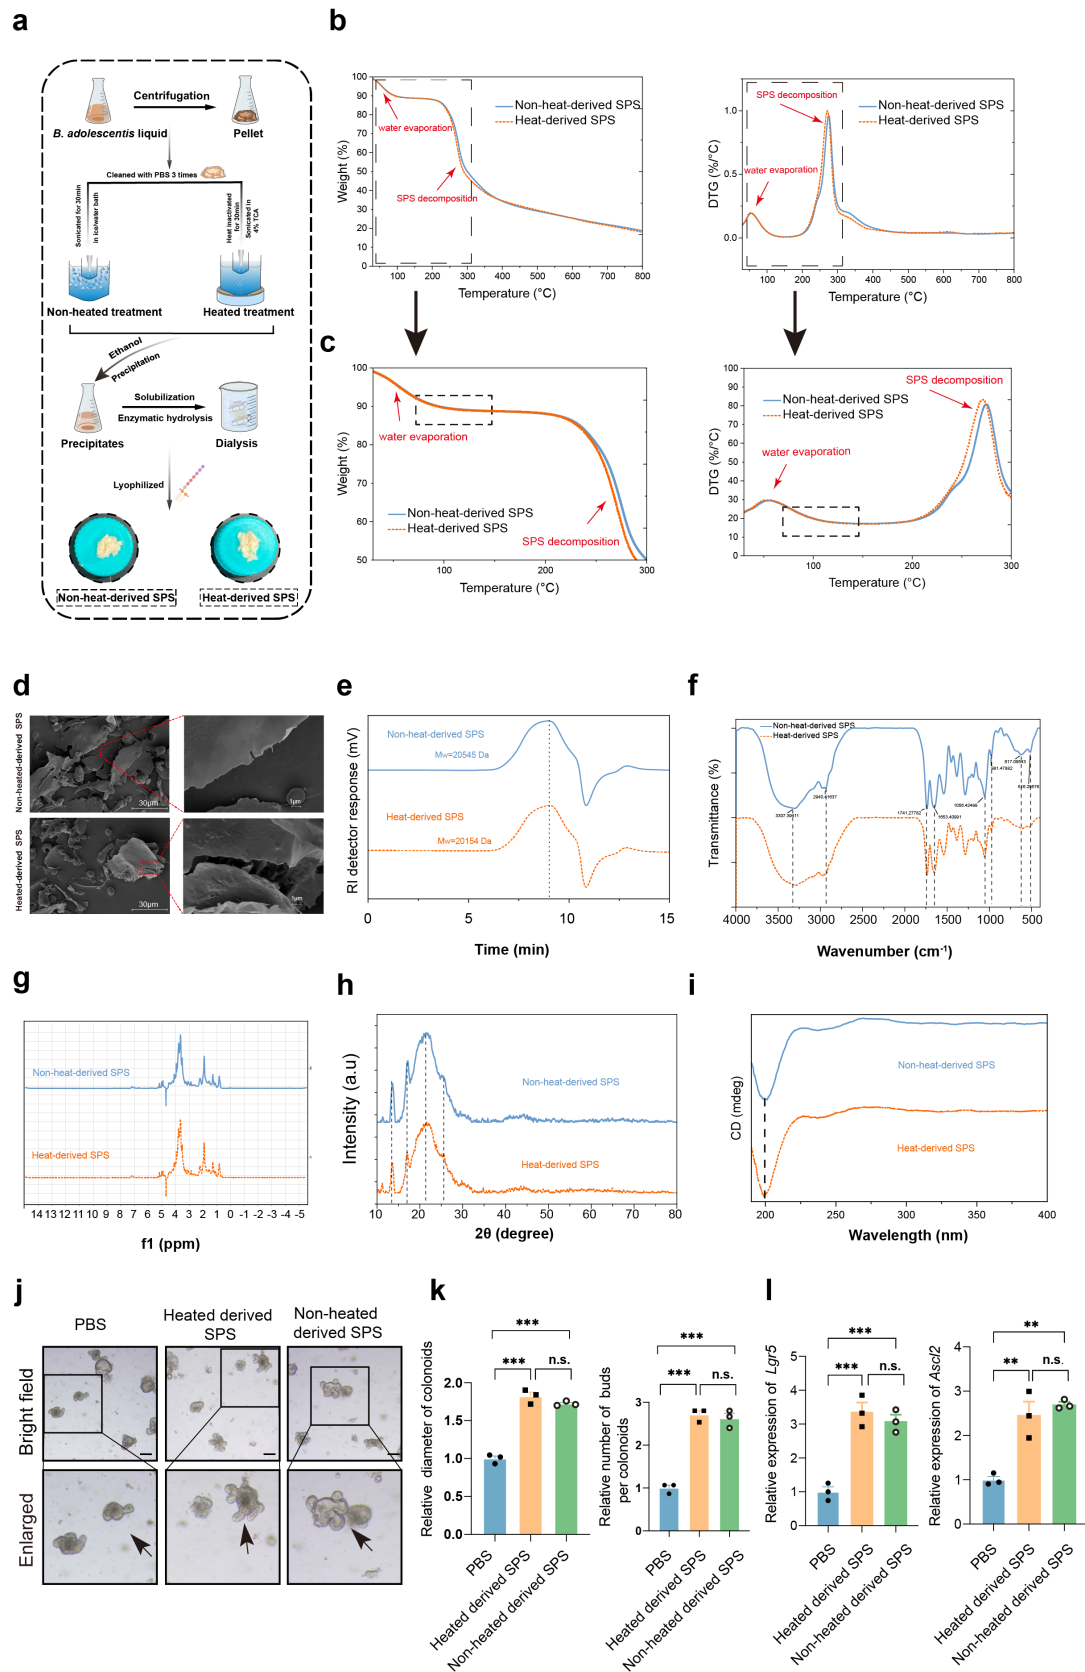

**Supplementary Fig. 9** The soluble polysaccharides (SPS) derived from both live *B. adolescentis* and heat-inactivated *B. adolescentis* demonstrated similar structural characterization and comparable promotion effects *in vitro* colonoids models.

(a). Schematic diagrams of extracted SPS from heated-inactivated (95 °C) and non-heated *B. adolescentis*. (b-c). Thermal gravimetric analysis (TGA) and Derivative Thermogravimetry (DTG) curves of non-heated-derived SPS and heated-derived SPS (Above). Locally magnified curves at around 100 °C ( Below). (d). Scanning electron microscopy (SEM) images (at 500 × and 5000 × magnification) of non-heated-derived SPS and heated-derived SPS. (e). Gel permeation chromatography (GPC) profiles of non-heated-derived SPS and heated-derived SPS. (f). Fourier-transform infrared spectroscopy (FT-IR) of non-heated-derived SPS and heated-derived SPS. (g). Nuclear <sup>1</sup>H magnetic resonance (<sup>1</sup>H-NMR) spectrum of non-heated-derived SPS and heated-derived SPS. (h). X-ray diffraction (XRD) patterns of non-heated-derived SPS and heated-derived SPS. (i). Circular dichroism (CD) spectrum of non-heated-derived SPS and heated-derived SPS. (j). Representative images in the organoid-forming capacity of crypts from PBS, heated derived SPS, non-heated derived SPS treated group. n = 3 independent experiments. Arrows indicate crypt domains. Scale bar, 100 μm. (k). Relative size of colonoids quantified on 7 and represented relative to PBS treated group. n = 3 independent experiments. Data were represented as mean ± SEM. Comparisons were performed by One-way ANOVA analysis followed by Tukey's multiple comparisons test. (l). Relative expression of *Lgr5* and *Ascl2* gene in PBS, heated derived SPS, non-heated derived SPS treated group. n = 3 independent experiments. Data were represented as mean ± SEM. Comparisons were performed by One-way ANOVA analysis followed by Tukey's multiple comparisons test, \*\**p* < 0.01, \*\*\**p* < 0.001. n.s. not significant. SPS, Soluble polysaccharides. Source data and exact *p*-value are provided as a Source Data file.

**Supplementary Table 1: Primers used for validation of the gene expression**

| Primers                           | Sequencing(5'-3')         |
|-----------------------------------|---------------------------|
| <i>universal Eubacteria 16s-F</i> | CGGCAACGAGCGCAACCC        |
| <i>universal Eubacteria 16s-R</i> | CCATTGTAGCACGTGTGTAGCC    |
| <i>B. adolescentis-F</i>          | CTCCGCCGCTGATCCGGAAGTCG   |
| <i>B. adolescentis-R</i>          | AACCAACTCGGCGATGTGGACGACA |
| mouse- <i>p16-F</i>               | TGTTGAGGCTAGAGAGGATCTTG   |
| mouse- <i>p16-R</i>               | CGAATCTGCACCGTAGTTGAGC    |
| mouse- <i>p21-F</i>               | TCGCTGTCTTGCACCTCTGGTGT   |
| mouse- <i>p21-R</i>               | CCAATCTGCGCTTGGAGTGATAG   |
| mouse- <i>p53-F</i>               | CTGGTTAGTCCTGAGACAGAGG    |
| mouse- <i>p53-R</i>               | AGATGCAGCCAAACACAGGCAC    |
| mouse- <i>Lgr5-F</i>              | CCTACTCGAAGACTTACCCAGT    |
| mouse- <i>Lgr5-R</i>              | GCATTGGGGTGAATGATAGCA     |
| mouse- <i>c-Myc-F</i>             | GTCTTTCCCTACCCGCTCAA      |
| mouse- <i>c-Myc-R</i>             | TCTTCTTGCTCTTCTTCAGAGTCG  |
| mouse- <i>CyclinD1-F</i>          | GCAGAAGGAGATTGTGCCATCC    |
| mouse- <i>CyclinD1-R</i>          | AGGAAGCGGTCCAGGTAGTTCA    |
| mouse- <i>Axin2-F</i>             | ATGGAGTCCCTCCTTACCGCAT    |
| mouse- <i>Axin2-R</i>             | GTTCCACAGGCGTCATCTCCTT    |
| mouse- <i>Notch1-F</i>            | CACCAGGGTGGTCAGGAAAA      |
| mouse- <i>Notch1-R</i>            | GGGCAGCGACAGATGTATGA      |
| mouse- <i>Dll1-F</i>              | GCAGGACCTTCTTTTCGCGTAT    |
| mouse- <i>Dll1-R</i>              | AAGGGGAATCGGATGGGGTT      |
| mouse- <i>Dll4-F</i>              | TTCCAGGCAACCTTCTCCGA      |
| mouse- <i>Dll4-R</i>              | ACTGCCGCTATTCTTGTTCCC     |
| mouse- <i>Jagged1-F</i>           | CCTCGGGTCAGTTTGAGCTG      |
| mouse- <i>Jagged1-R</i>           | CCTTGAGGCACACTTTGAAGTA    |
| mouse- <i>Wnt3a-F</i>             | CTCGCTGGCTACCCAATTTG      |
| mouse- <i>Wnt3a-R</i>             | CTTCACACCTTCTGCTACGCT     |
| mouse- <i>Wnt3-F</i>              | CAAGCACAACAATGAAGCAGGC    |
| mouse- <i>Wnt3-R</i>              | TCGGGACTCACGGTGTTCCTC     |
| mouse- <i>Wnt1-F</i>              | ATGAACCTTCACAACAACGAG     |
| mouse- <i>Wnt1-R</i>              | GGTTGCTGCCTCGGTTG         |
| mouse- <i>Wnt5a-R</i>             | GGAACGAATCCACGCTAAGGGT    |
| mouse- <i>Wnt5a-F</i>             | AGCACGTCTTGAGGCTACAGGA    |
| mouse- <i>Wnt11-F</i>             | GCCTGTGAAGGACTCAGAACTTG   |
| mouse- <i>Wnt11-R</i>             | AGCTGTCACTGCCGTTGGAAGT    |
| mouse- <i>Lyz1-F</i>              | TACAACCGTGGAGACCGAAGCA    |
| mouse- <i>Lyz1-R</i>              | TGGCTGCAGTGATGTCATCCTG    |
| mouse- <i>Reg4-F</i>              | CTGGCTATCAGAGAAACCTGCC    |
| mouse- <i>Reg4-R</i>              | CTGGCTTCACTCTTTGTCCTGG    |
| mouse- <i>Car4-F</i>              | CCCTCTACTGAAGACTCAGGC     |
| mouse- <i>Car4-R</i>              | TCTCCTCCGATAATGCACGC      |
| mouse- <i>cKit-F</i>              | TCATCGAGTGTGATGGGAAA      |
| mouse- <i>cKit-R</i>              | GGTGACTTGTTTCAGGCACA      |
| mouse- <i>Cd24a-F</i>             | CCAAGCCTGTCCCGTTCC        |

|                                  |                                |
|----------------------------------|--------------------------------|
| mouse- <i>Cd24a</i> -R           | <i>GGTTGCAGTAAATCTGCGTGG</i>   |
| mouse- <i>Spib</i> -F            | <i>TGCTCTGAACCACCATGCTT</i>    |
| mouse- <i>Spib</i> -R            | <i>CCCATGTAGAGTCAAGGCCC</i>    |
| mouse- $\beta$ - <i>Actin</i> -F | <i>TGTTACCAACTGGGACGACA</i>    |
| mouse- $\beta$ - <i>Actin</i> -R | <i>GGGGTGTTGAAGGTCTCAA</i>     |
| human- <i>LGR5</i> _1F           | <i>CCGCTTCCTGGAGGAGTTAC</i>    |
| human- <i>LGR5</i> _1R           | <i>GCATCCAGACGCAGGGATTG</i>    |
| human- <i>LYZ</i> _3F            | <i>ACTACAATGCTGGAGACAGAAGC</i> |
| human- <i>LYZ</i> _3R            | <i>GCACAAGCTACAGCATCAGCGA</i>  |
| human- <i>REG4</i> _3F           | <i>TGAGGAACTGGTCTGATGCCGA</i>  |
| human- <i>REG4</i> _3R           | <i>TCCATATCGGCTGGCTTCTCTG</i>  |
| human- $\beta$ - <i>ACTIN</i> -F | <i>GTGAAGGTGACAGCAGTCGGTT</i>  |
| human- $\beta$ - <i>ACTIN</i> -R | <i>GAAGTGGGGTGGCTTTTAGGA</i>   |

---

Supplementary Table S2: The gender and age of participants in human samples

| Sample ID | Gender | Age |
|-----------|--------|-----|
| QN1       | M      | 39  |
| QN2       | F      | 44  |
| QN3       | M      | 39  |
| QN4       | F      | 45  |
| QN5       | F      | 65  |
| QN6       | M      | 45  |
| QN7       | M      | 55  |
| QN8       | M      | 53  |
| QN9       | F      | 45  |
| QN10      | M      | 43  |
| QN11      | F      | 40  |
| QN13      | M      | 67  |
| QN14      | F      | 54  |
| QN15      | M      | 62  |
| QN16      | M      | 40  |
| QN18      | F      | 47  |
| QN19      | F      | 61  |
| QN20      | M      | 69  |
| QN21      | F      | 67  |
| QN23      | F      | 62  |
| QN24      | F      | 45  |
| QN26      | M      | 44  |
| N1        | F      | 52  |
| N2        | M      | 58  |
| N3        | M      | 50  |
| N4        | F      | 62  |
| N5        | M      | 59  |
| N6        | M      | 63  |
| N7        | M      | 39  |
| N8        | F      | 72  |
| N9        | F      | 73  |
| N10       | F      | 71  |
| N11       | M      | 49  |
| N12       | F      | 49  |
| N13       | F      | 69  |
| N14       | F      | 70  |
| N20       | F      | 43  |
| N21       | F      | 32  |
| N22       | M      | 54  |
| N23       | F      | 65  |
